# Supplementary material
Source: publisher figshare collection journal article supplement (https://tandf.figshare.com/articles/dataset/_/6886433)

A

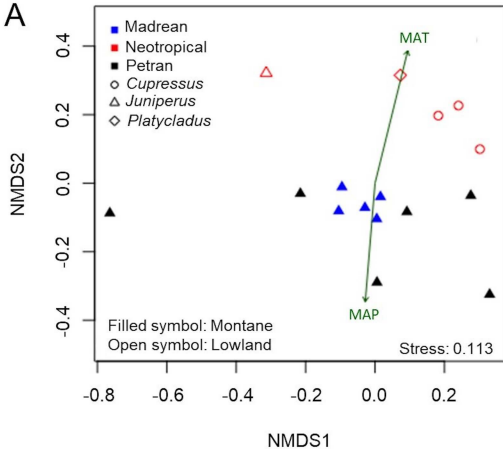

B

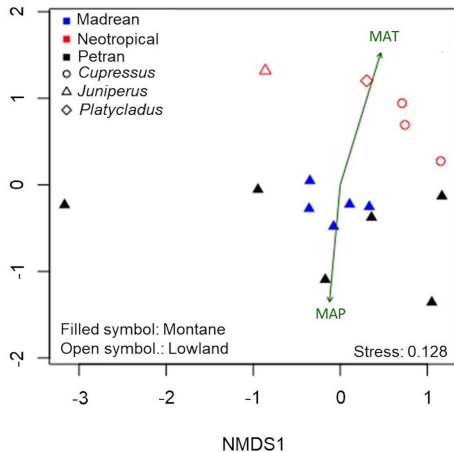

Supplement: Supplementary file 1 [file 1]

**A**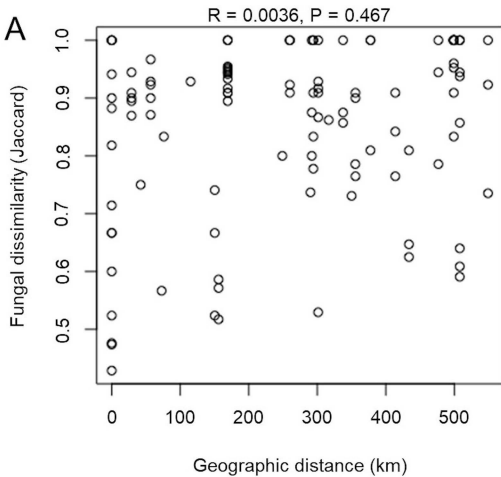**B**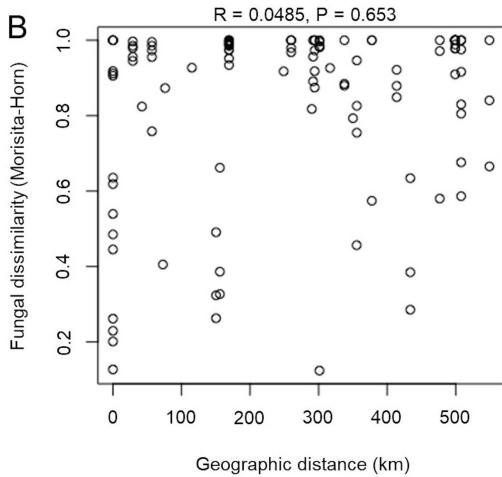

Supplement: Supplementary file 2 [file 1]

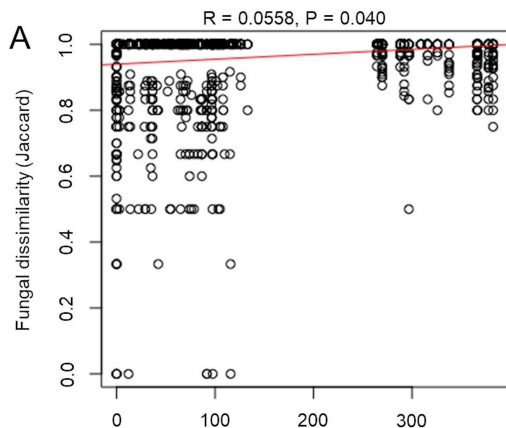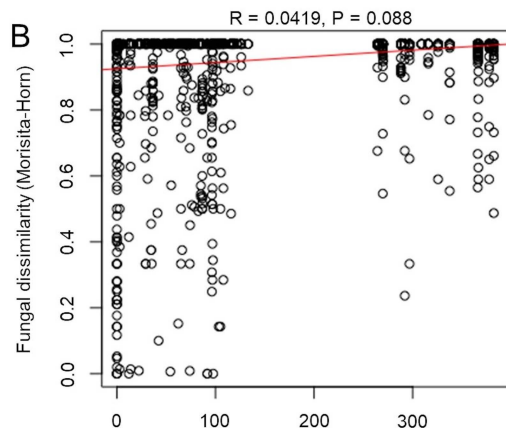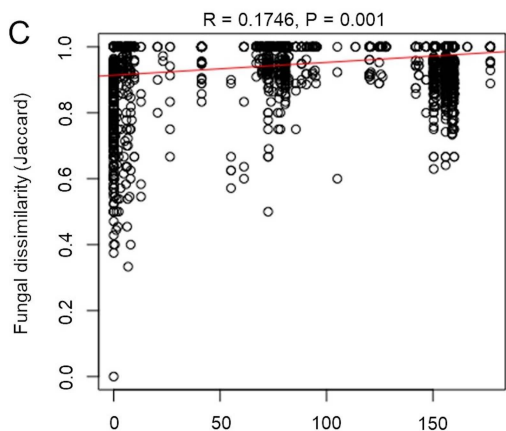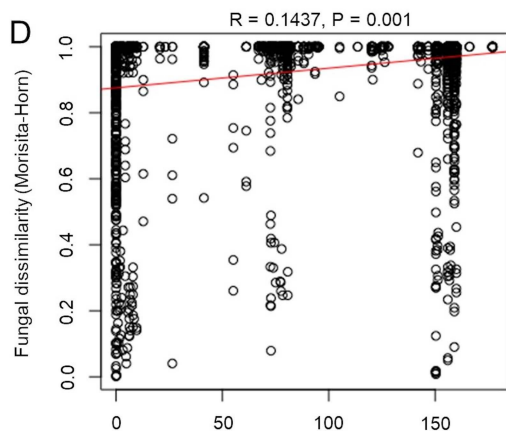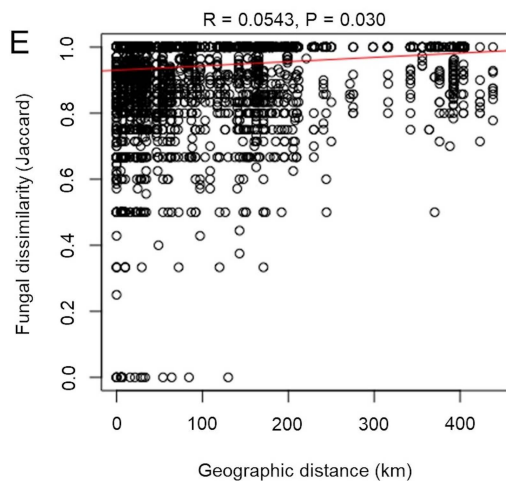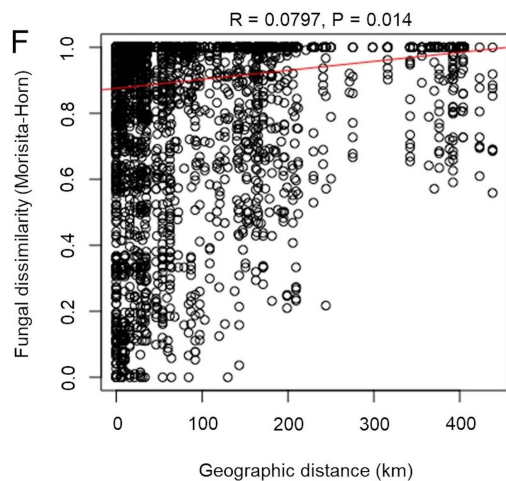

Supplement: Supplementary file 3 [file 1]

**A**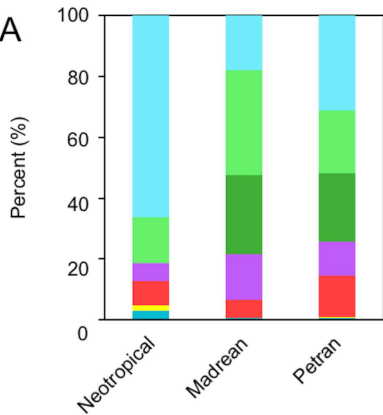**B**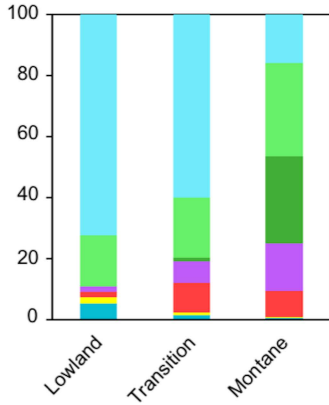**C**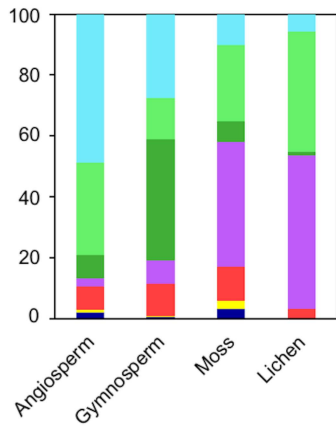

Supplement: Supplementary file 4 [file 1]
